# Supplementary material for: Very few sites can reshape the inferred phylogenetic tree
Source: PeerJ journal article supplement (doi:10.7717/peerj.8865), 2020-07-08

Histogram of sitewise lnL from Whelan D16 Opisthokont dataset

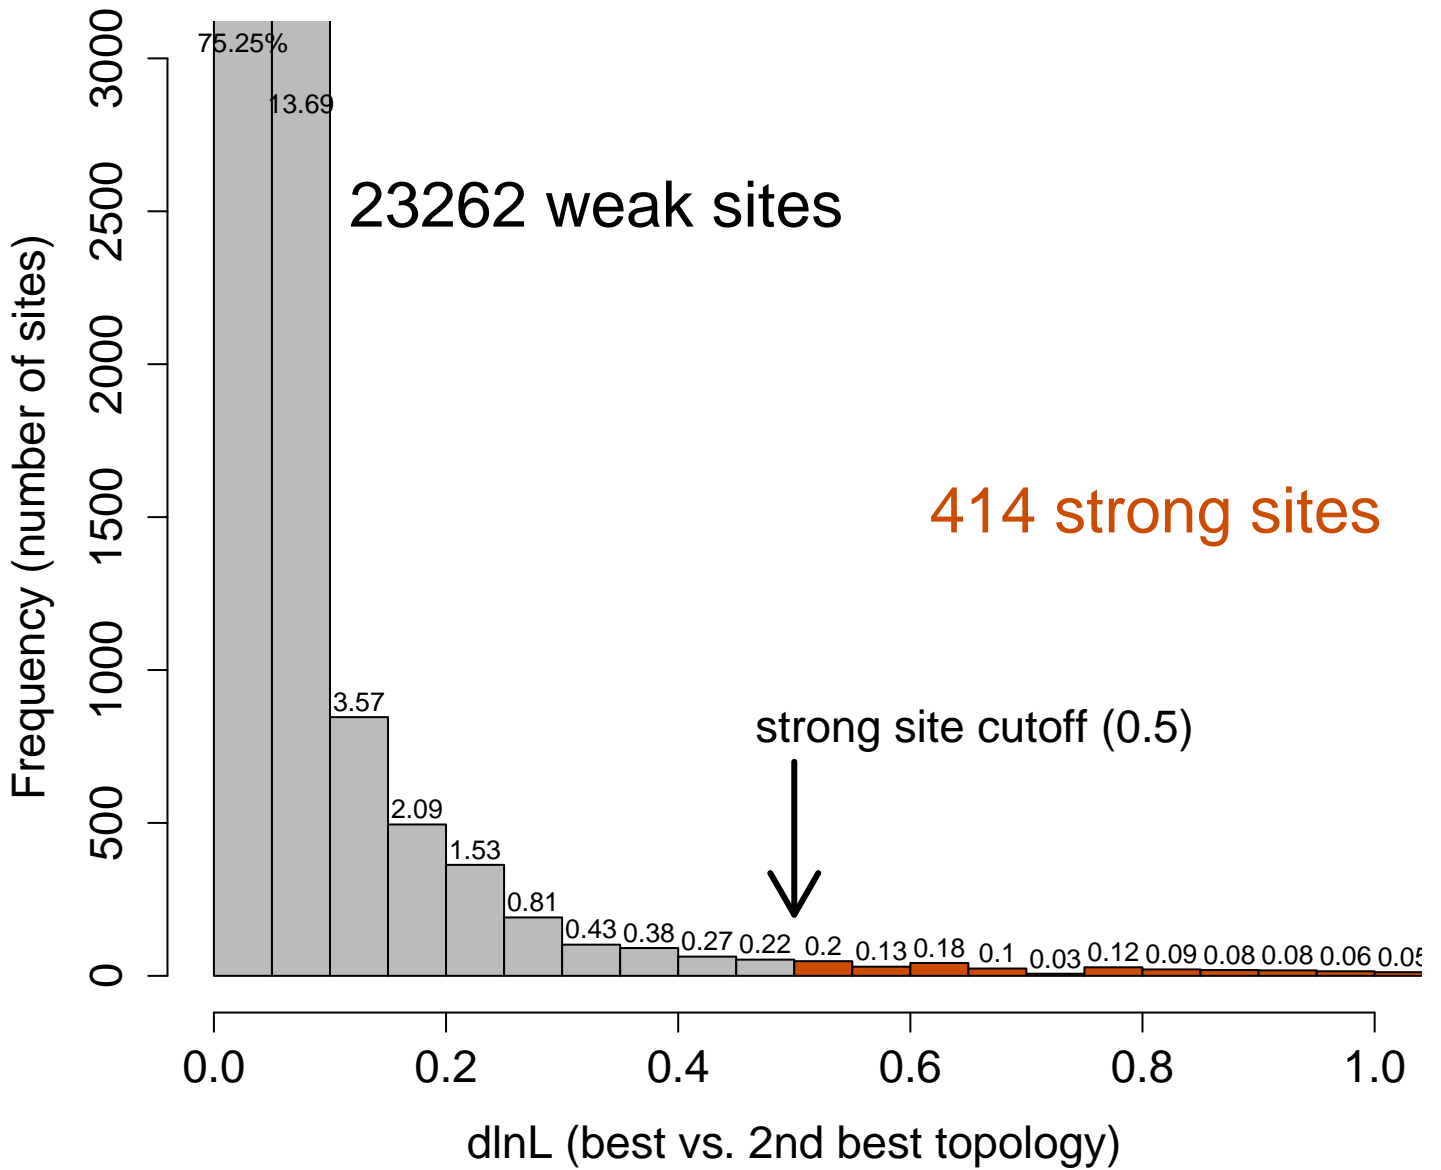

# RxML\_perSiteLLs.Whelan\_D16\_Opisthokonta\_gene\_1k.tab

Favors T1 ( 13 genes, 94.7 )

Favors T2 ( 0 genes, 0 )

Favors T3 ( 0 genes, 0 )

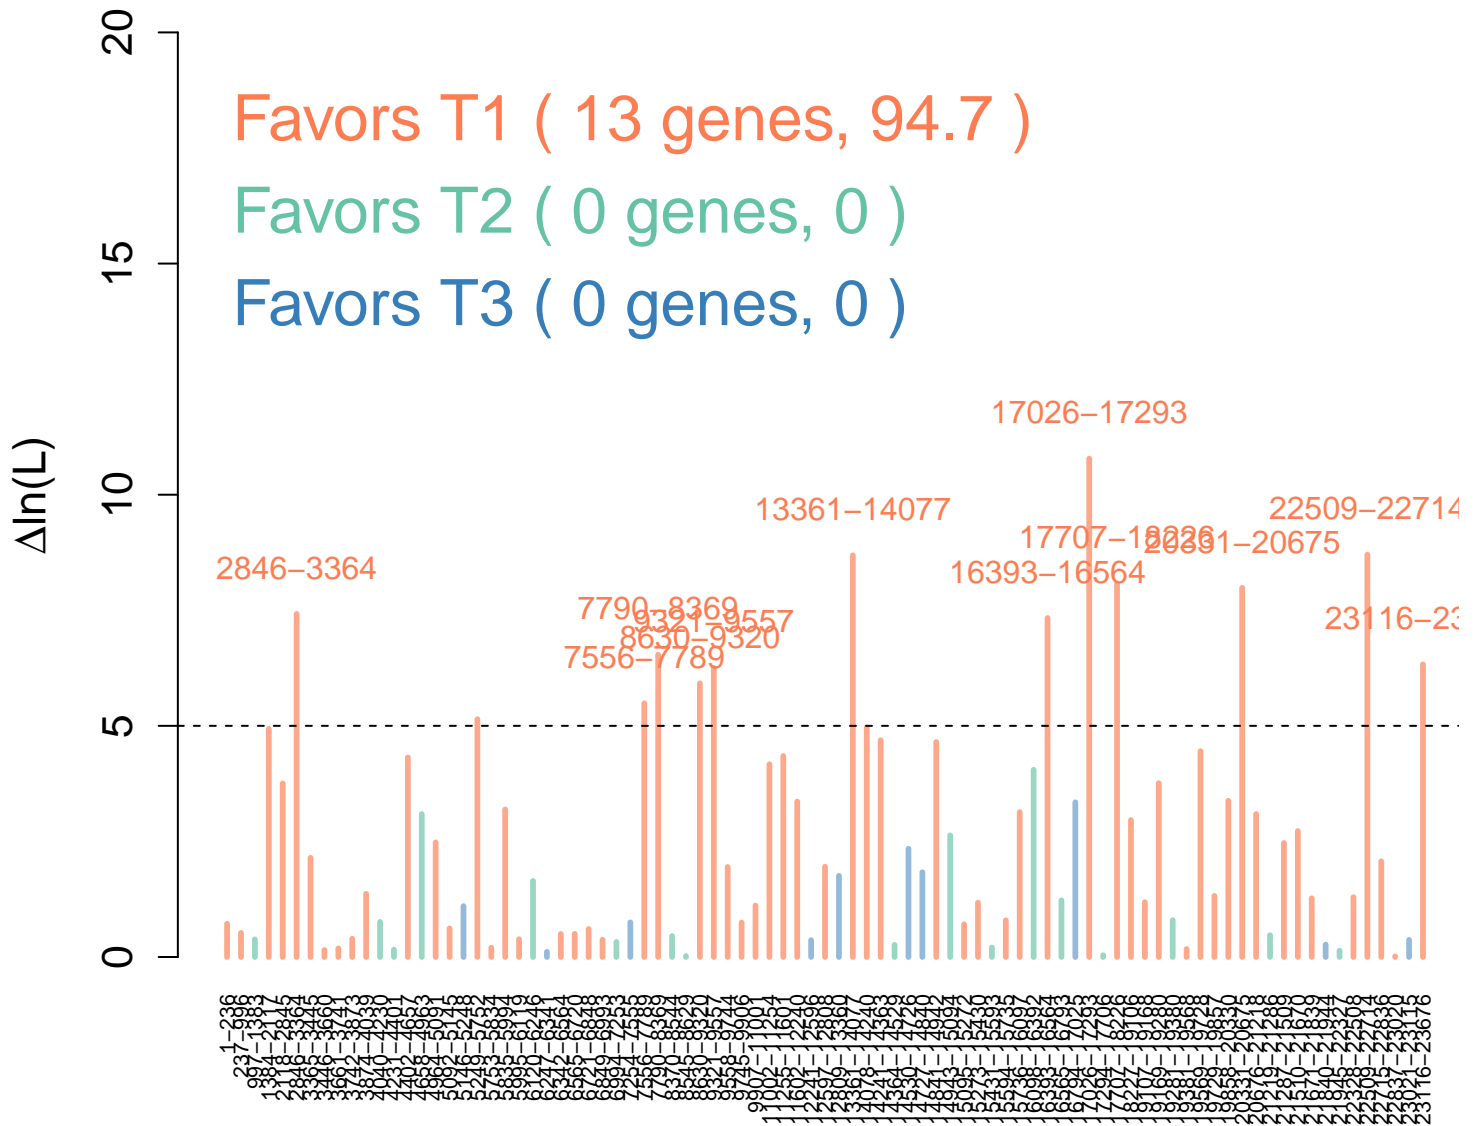

# Weak dataset d16\_chain\_01.trace + d16\_chain\_02.trace

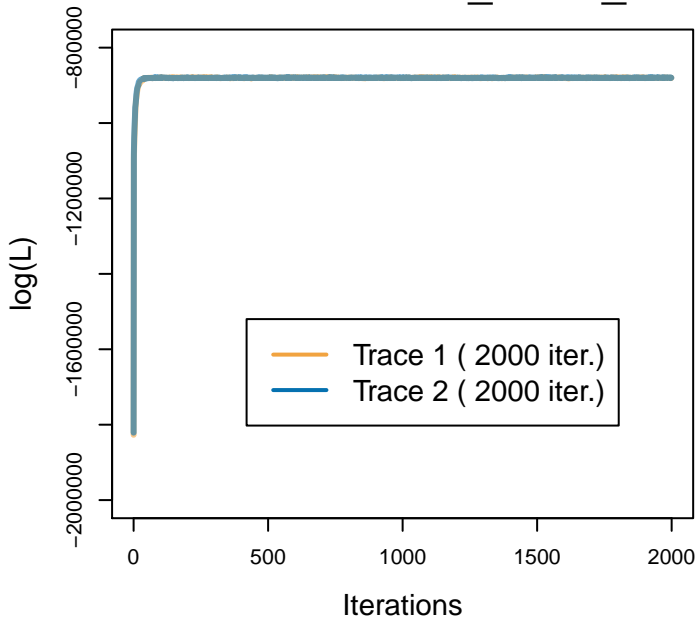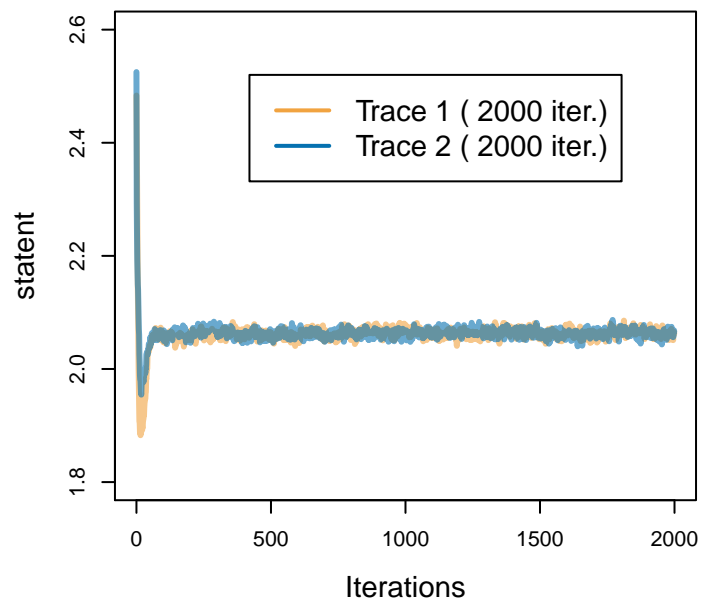

## Final iterations = 2000

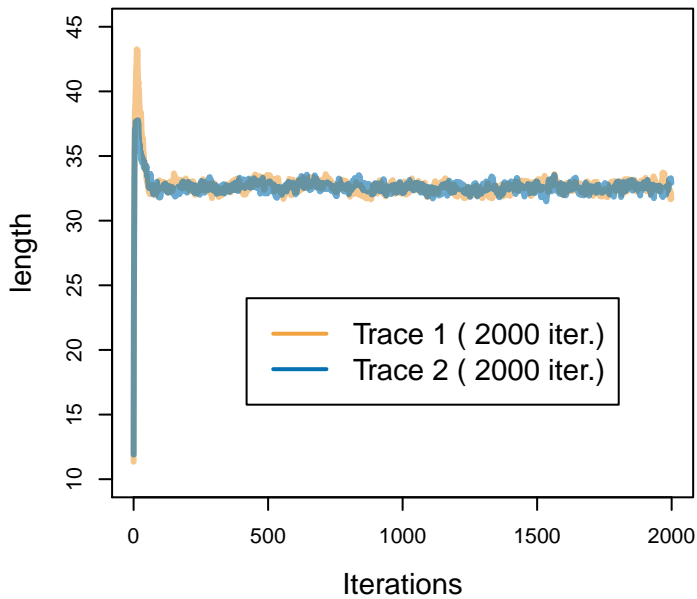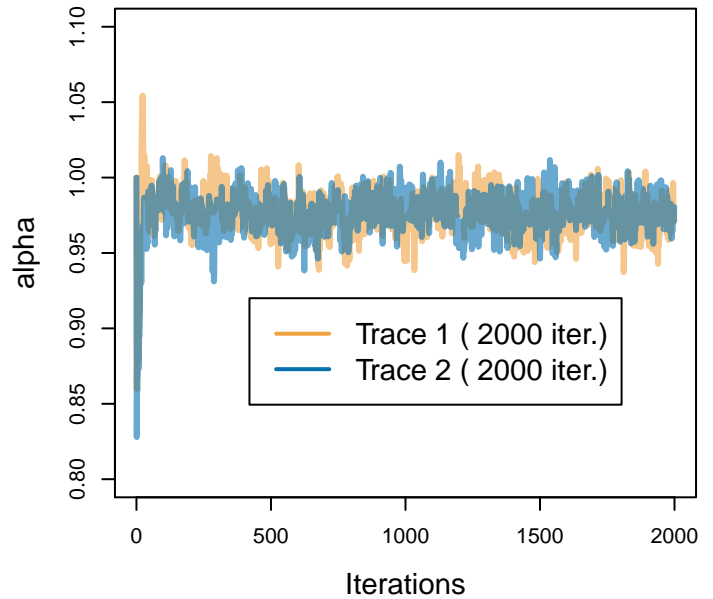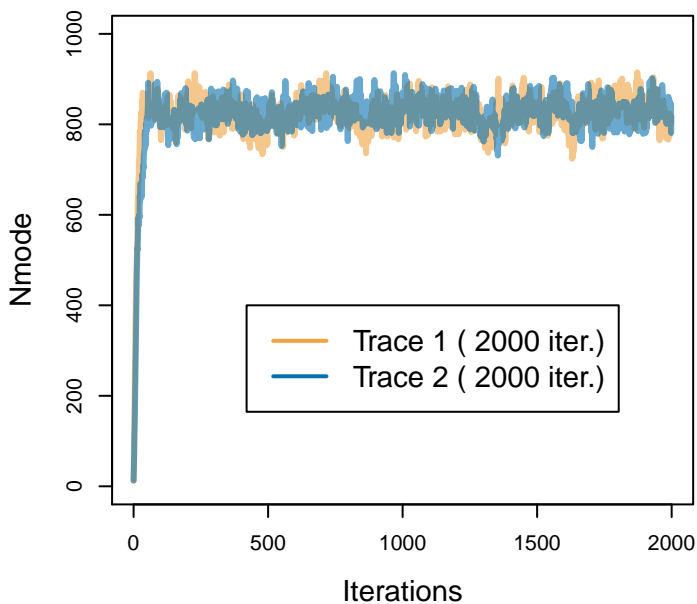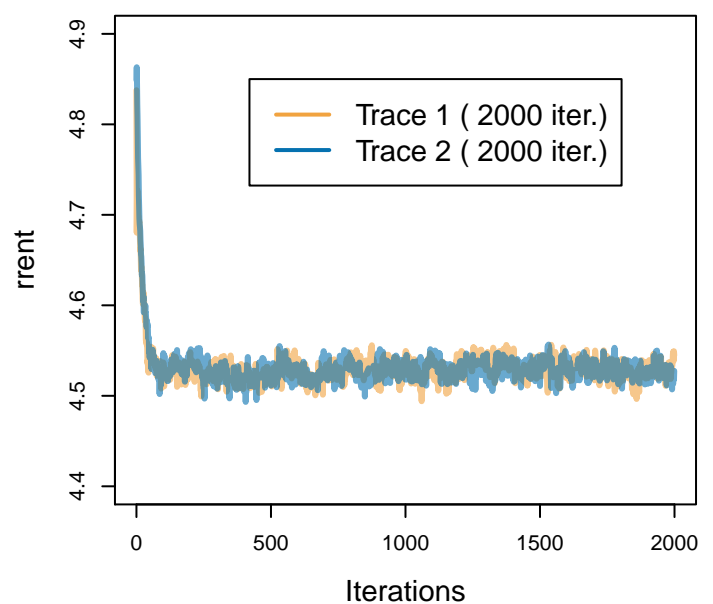

**Weak D16 dataset Chain 1**

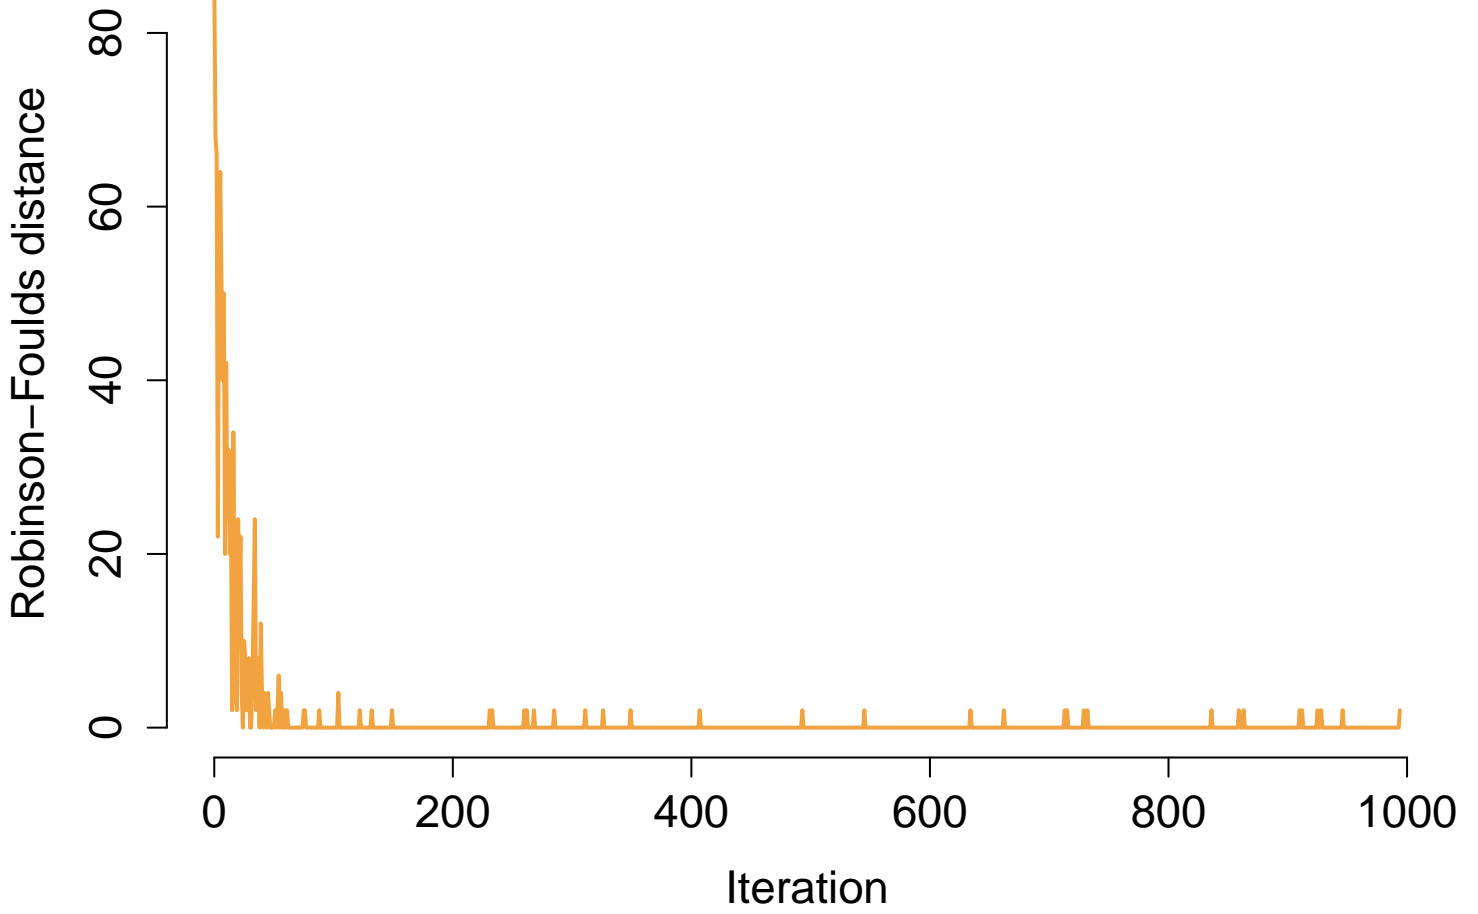

**Weak D16 dataset Chain 2**

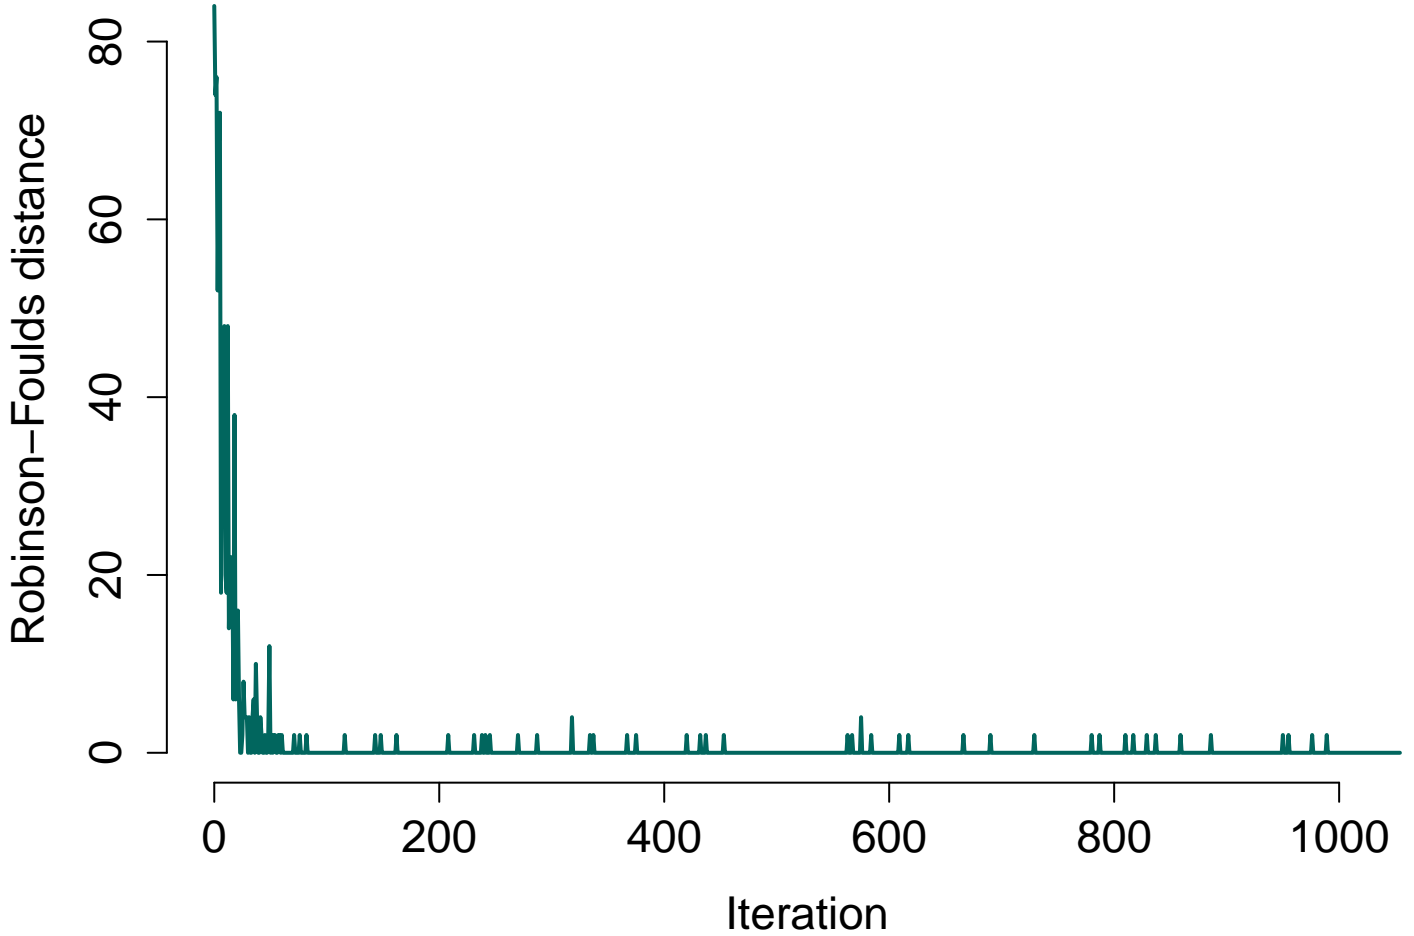

Supplement: paranimalia_supp_figs_a4.pdf [file paranimalia_supp_figs_a4.pdf]
